# Supplementary material for: Highly sensitive detection of a HER2 12-base pair duplicated insertion mutation in lung cancer using the Eprobe-PCR method
Source: PubMed Central journal article supplement (PMC5289711; doi:10.1371/journal.pone.0171225), 2017-02-02
Supplement: pone.0171225.s002.pdf [file pone.0171225.s002.pdf]

**Ad071 (Mutant)**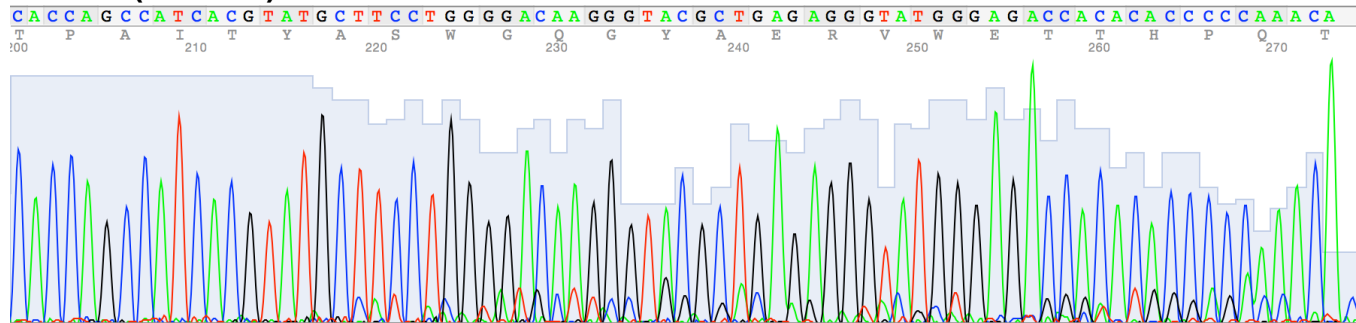**Ad096 (Mutant)**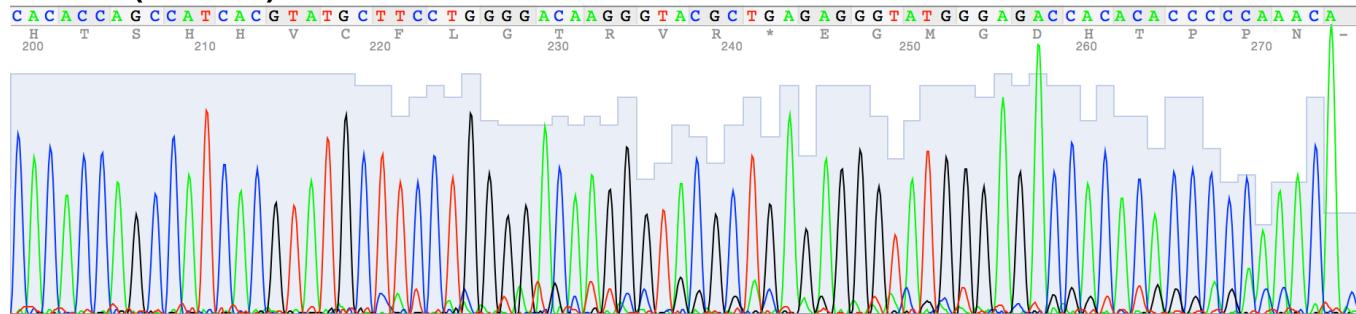**Ad154 (Mutant)**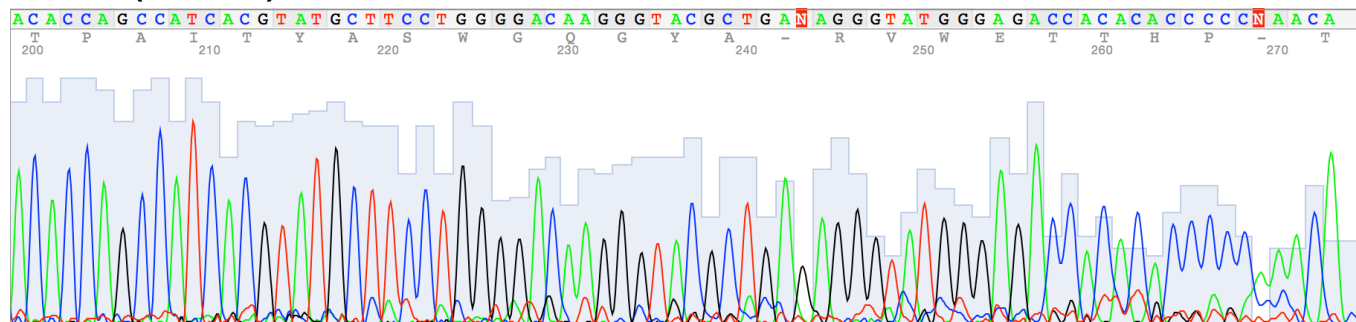**Ad238 (Wild)**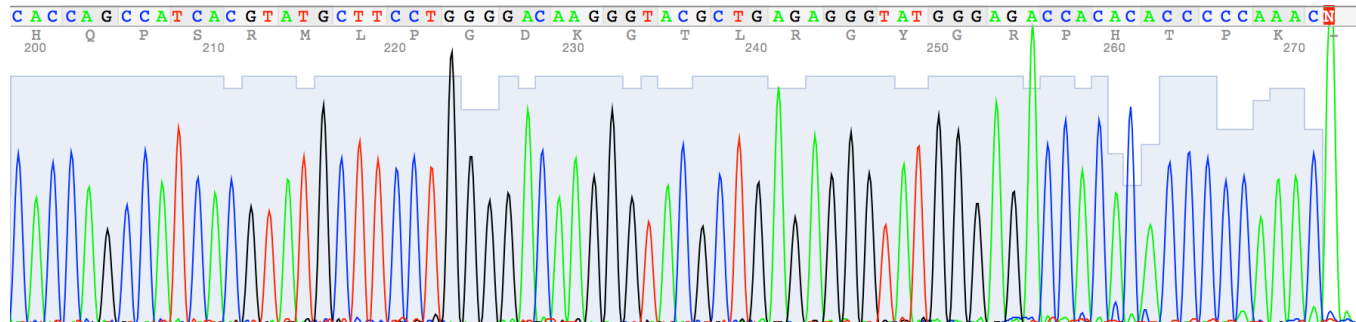**Ad253 (Mutant)**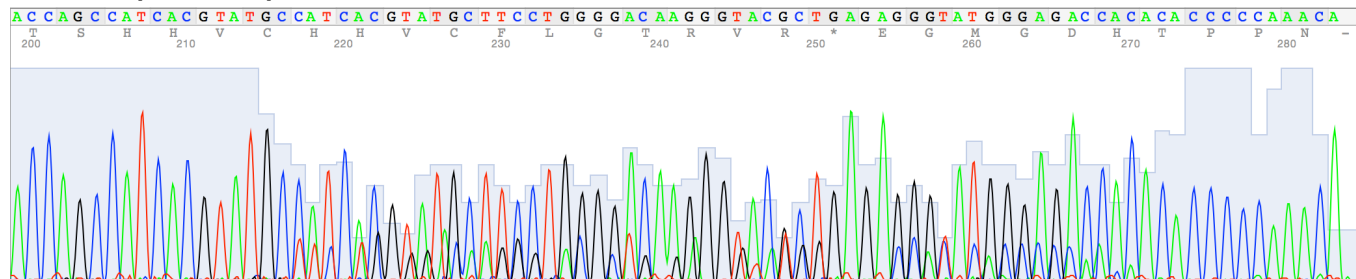

### Ad264 (Mutant)

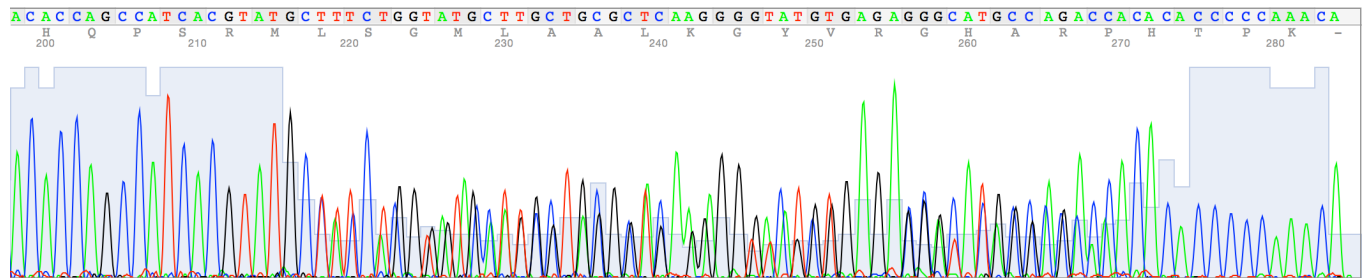

### Ad341 (Wild)

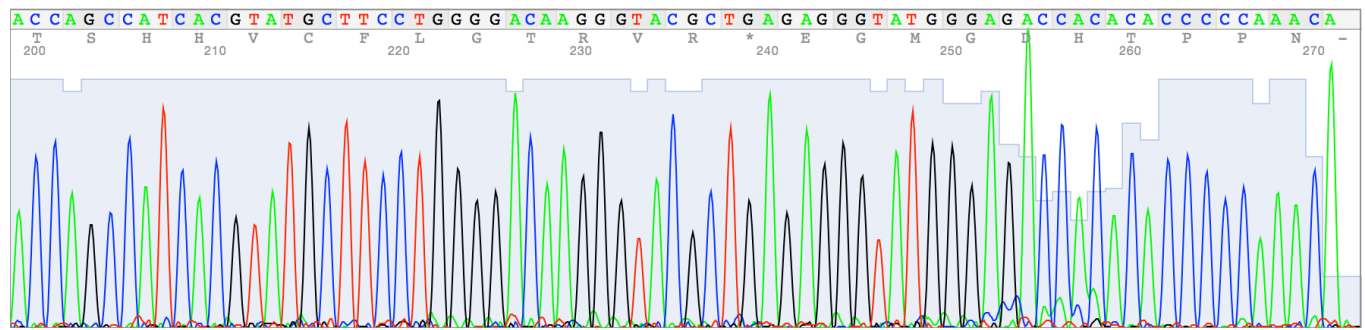

### Ad367 (Mutant)

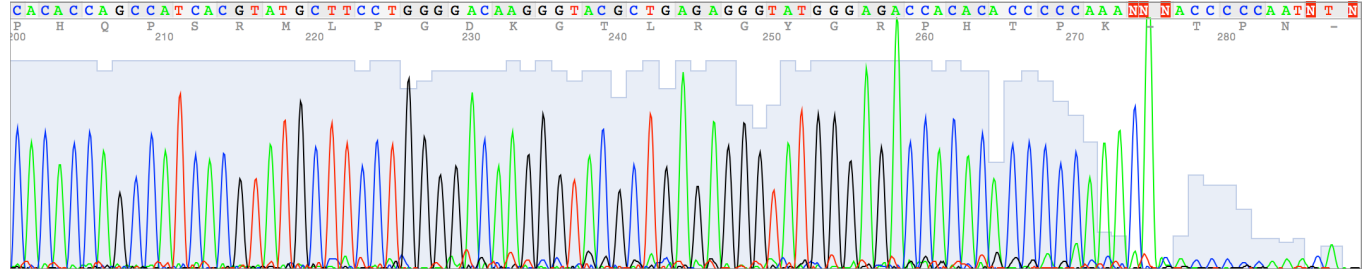

### Ad385 (Mutant)

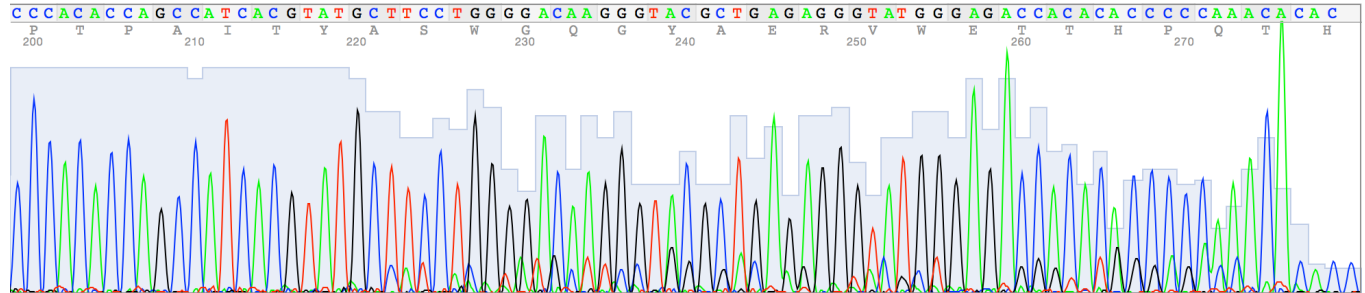

## Supplementary Figure 2. Electrograms of Sanger sequencing.

The electrograms show the results for 9 mutation positive specimens determined by Eprobe-PCR method. The Sanger sequencing were carried out by the method described as “Materials and Methods” in the manuscript.
